# Supplementary material for: Pachychoroid Spectrum Diseases in Patients with Cushing’s Syndrome: A Systematic Review with Meta-Analyses
Source: MDPI journal article supplement (doi:10.3390/jcm11154437), 2022-07-29
Supplement: s1 [file s1]

**Supplementary Table S3.** Sensitivity analysis of the summary estimate prevalence of central serous chorioretinopathy.

| Excluded study     | Pooled<br>Prevalence | LCI 95% | HCI 95% | Cochran<br>Q | p        | I <sup>2</sup> |
|--------------------|----------------------|---------|---------|--------------|----------|----------------|
| Eymard et al. 2021 | 11,7%                | 4,4%    | 21,6%   | 7,17         | 0,066751 | 58,14          |
| Karaca et al. 2017 | 8,4%                 | 0,0%    | 24,8%   | 19,20        | 0,000249 | 84,37          |
| Abalem et al. 2016 | 7,0%                 | 0,0%    | 20,6%   | 19,16        | 0,000253 | 84,34          |
| Wang et al. 2019   | 7,9%                 | 0,0%    | 20,2%   | 16,85        | 0,00076  | 82,19          |
| Brinks et al. 2021 | 4,8%                 | 0,2%    | 13,3%   | 10,84        | 0,012639 | 72,32          |
