# Supplementary material for: Pachychoroid Spectrum Diseases in Patients with Cushing’s Syndrome: A Systematic Review with Meta-Analyses
Source: MDPI journal article supplement (doi:10.3390/jcm11154437), 2022-07-29
Supplement: s1 [file s1]

**Supplementary Table S2.** Sensitivity analysis of the summary estimate prevalence of pachychoroid pigment epitheliopathy.

| Excluded study        | Pooled<br>Prevalence | LCI 95% | HCI 95% | Cochran<br>Q | p        | I <sup>2</sup> |
|-----------------------|----------------------|---------|---------|--------------|----------|----------------|
| Abalem et al. 2016    | 25,4%                | 10,9%   | 43,2%   | 4,15         | 0,041754 | 75,88          |
| Eymard et al. 2021    | 20,2%                | 1,2%    | 49,6%   | 5,79         | 0,016119 | 82,73          |
| Lassandro et al. 2022 | 15,6%                | 8,3%    | 24,6%   | 0,77         | 0,381506 | 0,00           |
