# Supplementary material for: Pachychoroid Spectrum Diseases in Patients with Cushing’s Syndrome: A Systematic Review with Meta-Analyses
Source: MDPI journal article supplement (doi:10.3390/jcm11154437), 2022-07-29
Supplement: s1 [file s1]

Supplementary File S1. Details of literature search.

PubMed:

History and Search Details

Download

Delete

| Search | Actions | Details | Query                                                                                                                                                                                                                                                                                                 | Results | Time     |
|--------|---------|---------|-------------------------------------------------------------------------------------------------------------------------------------------------------------------------------------------------------------------------------------------------------------------------------------------------------|---------|----------|
| #1     |         |         | Search: ("Cushing" OR "Cushings" OR "Cushing's" OR "Cushing Syndrome"[Mesh]) AND "Optical Coherence Tomography" Sort by: Most Recent<br>("Cushing"[All Fields] OR "Cushings"[All Fields] OR "Cushing's"[All Fields] OR "Cushing Syndrome"[MeSH Terms]) AND "Optical Coherence Tomography"[All Fields] | 19      | 04:56:40 |

## EMBASE:

### Search History

(7searches found)

| Contract | # ▲ Searches                                                                                                                                                                                                        | Results | Type             | Actions         | Annotations                                                                                                                                                                 |
|----------|---------------------------------------------------------------------------------------------------------------------------------------------------------------------------------------------------------------------|---------|------------------|-----------------|-----------------------------------------------------------------------------------------------------------------------------------------------------------------------------|
|          | 1 Cushing.mp. [mp=title, abstract, heading word, drug trade name, original title, device manufacturer, drug manufacturer, device trade name, keyword heading word, floating subheading word, candidate term word]   | 22792   | Advanced<br>More | Display Results |       |
|          | 2 Cushings.mp. [mp=title, abstract, heading word, drug trade name, original title, device manufacturer, drug manufacturer, device trade name, keyword heading word, floating subheading word, candidate term word]  | 14193   | Advanced<br>More | Display Results |       |
|          | 3 Cushing's.mp. [mp=title, abstract, heading word, drug trade name, original title, device manufacturer, drug manufacturer, device trade name, keyword heading word, floating subheading word, candidate term word] | 14189   | Advanced<br>More | Display Results |   |
|          | 4 *Cushing syndrome/ or *Cushing disease/                                                                                                                                                                           | 11319   | Advanced         | Display Results |   |

|   |                                                                                                                                                                                                                                                          |       |          |      |                                                                                                                                                                                         |
|---|----------------------------------------------------------------------------------------------------------------------------------------------------------------------------------------------------------------------------------------------------------|-------|----------|------|-----------------------------------------------------------------------------------------------------------------------------------------------------------------------------------------|
|   |                                                                                                                                                                                                                                                          |       | More     |      |                                                                                                                                                                                         |
| 5 | "Optical coherence tomography".mp.<br>[mp=title, abstract, heading word, drug<br>trade name, original title, device<br>manufacturer, drug manufacturer, device<br>trade name, keyword heading word,<br>floating subheading word, candidate term<br>word] | 85766 | Advanced | More | Display Results   |
| 6 | 1 or 2 or 3 or 4                                                                                                                                                                                                                                         | 25022 | Advanced | More | Display Results   |
| 7 | 5 and 6                                                                                                                                                                                                                                                  | 46    | Advanced | More | Display Results   |

Combine with:

Web of Science Core Collection, BIOSIS Previews, Current Contents Connect, Data Citation Index, Derwent Innovations Index, KCI-Korean Journal Database, SciELO Citation Index, Zoological Record:

**Web of Science™**

Search

Marked List

History

Alerts

Sign In ▾

Register

Search > Results for (Cushing OR Cushing's OR Cushings) AND "Optical coherence to...

**16 results from Web of Science Core Collection, BIOSIS Previews, Current Contents Connect, Data Citation Index, Derwent Innovations Index, KCI-Korean Journal Database, SciELO Citation Index, Zoological Record:**

🔍 (Cushing OR Cushing's OR Cushings) AND "Optical coherence tomography" (T...

Analyze Results

Citation Report

🔔 Create Alert

🔗 Copy query link

# The Cochrane Library:

## Advanced Search

[Search](#)[Search manager](#)[Medical terms \(MeSH\)](#)[PICO search](#)[Save this search](#)[View/Share saved searches](#)[? Search help](#)[+](#)[Print search history](#)[-](#)[+](#)

#1

("Cushing disease") OR ("Cushing syndrome") OR ("Cushing's syndrome") OR ("Cushings syndrome") OR (Cushing)

S ▼

Limits

729

(Word variations have been searched)

[-](#)[+](#)

#2

"Optical coherence tomography"

Limits

3989

[-](#)[+](#)

#3

#1 AND #2

Limits

1

[-](#)[+](#)

#4

Type a search term or use the S or MeSH buttons to compose

S ▼

MeSH ▼

Limits

N/A

[✕ Clear all](#)☐ Highlight orphan lines
