# Supplementary material for: Pachychoroid Spectrum Diseases in Patients with Cushing’s Syndrome: A Systematic Review with Meta-Analyses
Source: MDPI journal article supplement (doi:10.3390/jcm11154437), 2022-07-29
Supplement: s1 [file s1]

**Supplementary Table S4.** Sensitivity analysis of the summary estimate prevalence of polypoidal choroidal vasculopathy.

| Excluded study        | Pooled<br>Prevalence | LCI 95% | HCI 95% | Cochran<br>Q | p        | I <sup>2</sup> |
|-----------------------|----------------------|---------|---------|--------------|----------|----------------|
| Abalem et al. 2016    | 3,2%                 | 0,8%    | 6,8%    | 0,75         | 0,688448 | 0,00           |
| Brinks et al. 2021    | 3,2%                 | 0,8%    | 6,8%    | 0,75         | 0,688448 | 0,00           |
| Lassandro et al. 2022 | 2,2%                 | 0,1%    | 6,2%    | 1,10         | 0,576052 | 0,00           |
| Eymard et al. 2021    | 2,1%                 | 0,1%    | 5,9%    | 0,89         | 0,642218 | 0,00           |
