# Supplementary material for: Pachychoroid Spectrum Diseases in Patients with Cushing’s Syndrome: A Systematic Review with Meta-Analyses
Source: MDPI journal article supplement (doi:10.3390/jcm11154437), 2022-07-29
Supplement: s1 [file s1]

**Supplementary Table S1.** Sensitivity analysis of the weighted mean difference summary estimate in subfoveal choroidal thickness between patients with Cushing's syndrome and matched healthy controls.

| Excluded study        | Pooled<br>WMD | LCI 95% | HCI 95% | Cochran<br>Q | p        | I <sup>2</sup> |
|-----------------------|---------------|---------|---------|--------------|----------|----------------|
| Eymard et al. 2021    | 62,81         | 24,73   | 100,88  | 11,37        | 0,009882 | 73,62          |
| Karaca et al. 2017    | 52,31         | 0,27    | 104,35  | 21,25        | 9,34E-05 | 85,88          |
| Lassandro et al. 2022 | 51,66         | 3,92    | 99,40   | 21,52        | 8,21E-05 | 86,06          |
| Wang et al. 2019      | 48,94         | -1,86   | 99,75   | 21,60        | 7,9E-05  | 86,11          |
| Abalem et al. 2016    | 31,16         | 7,31    | 55,01   | 4,68         | 0,196651 | 35,92          |
