# Supplementary figures and images for: Pachychoroid Spectrum Diseases in Patients with Cushing’s Syndrome: A Systematic Review with Meta-Analyses
Source: MDPI journal article supplement (doi:10.3390/jcm11154437), 2022-07-29

Standard error

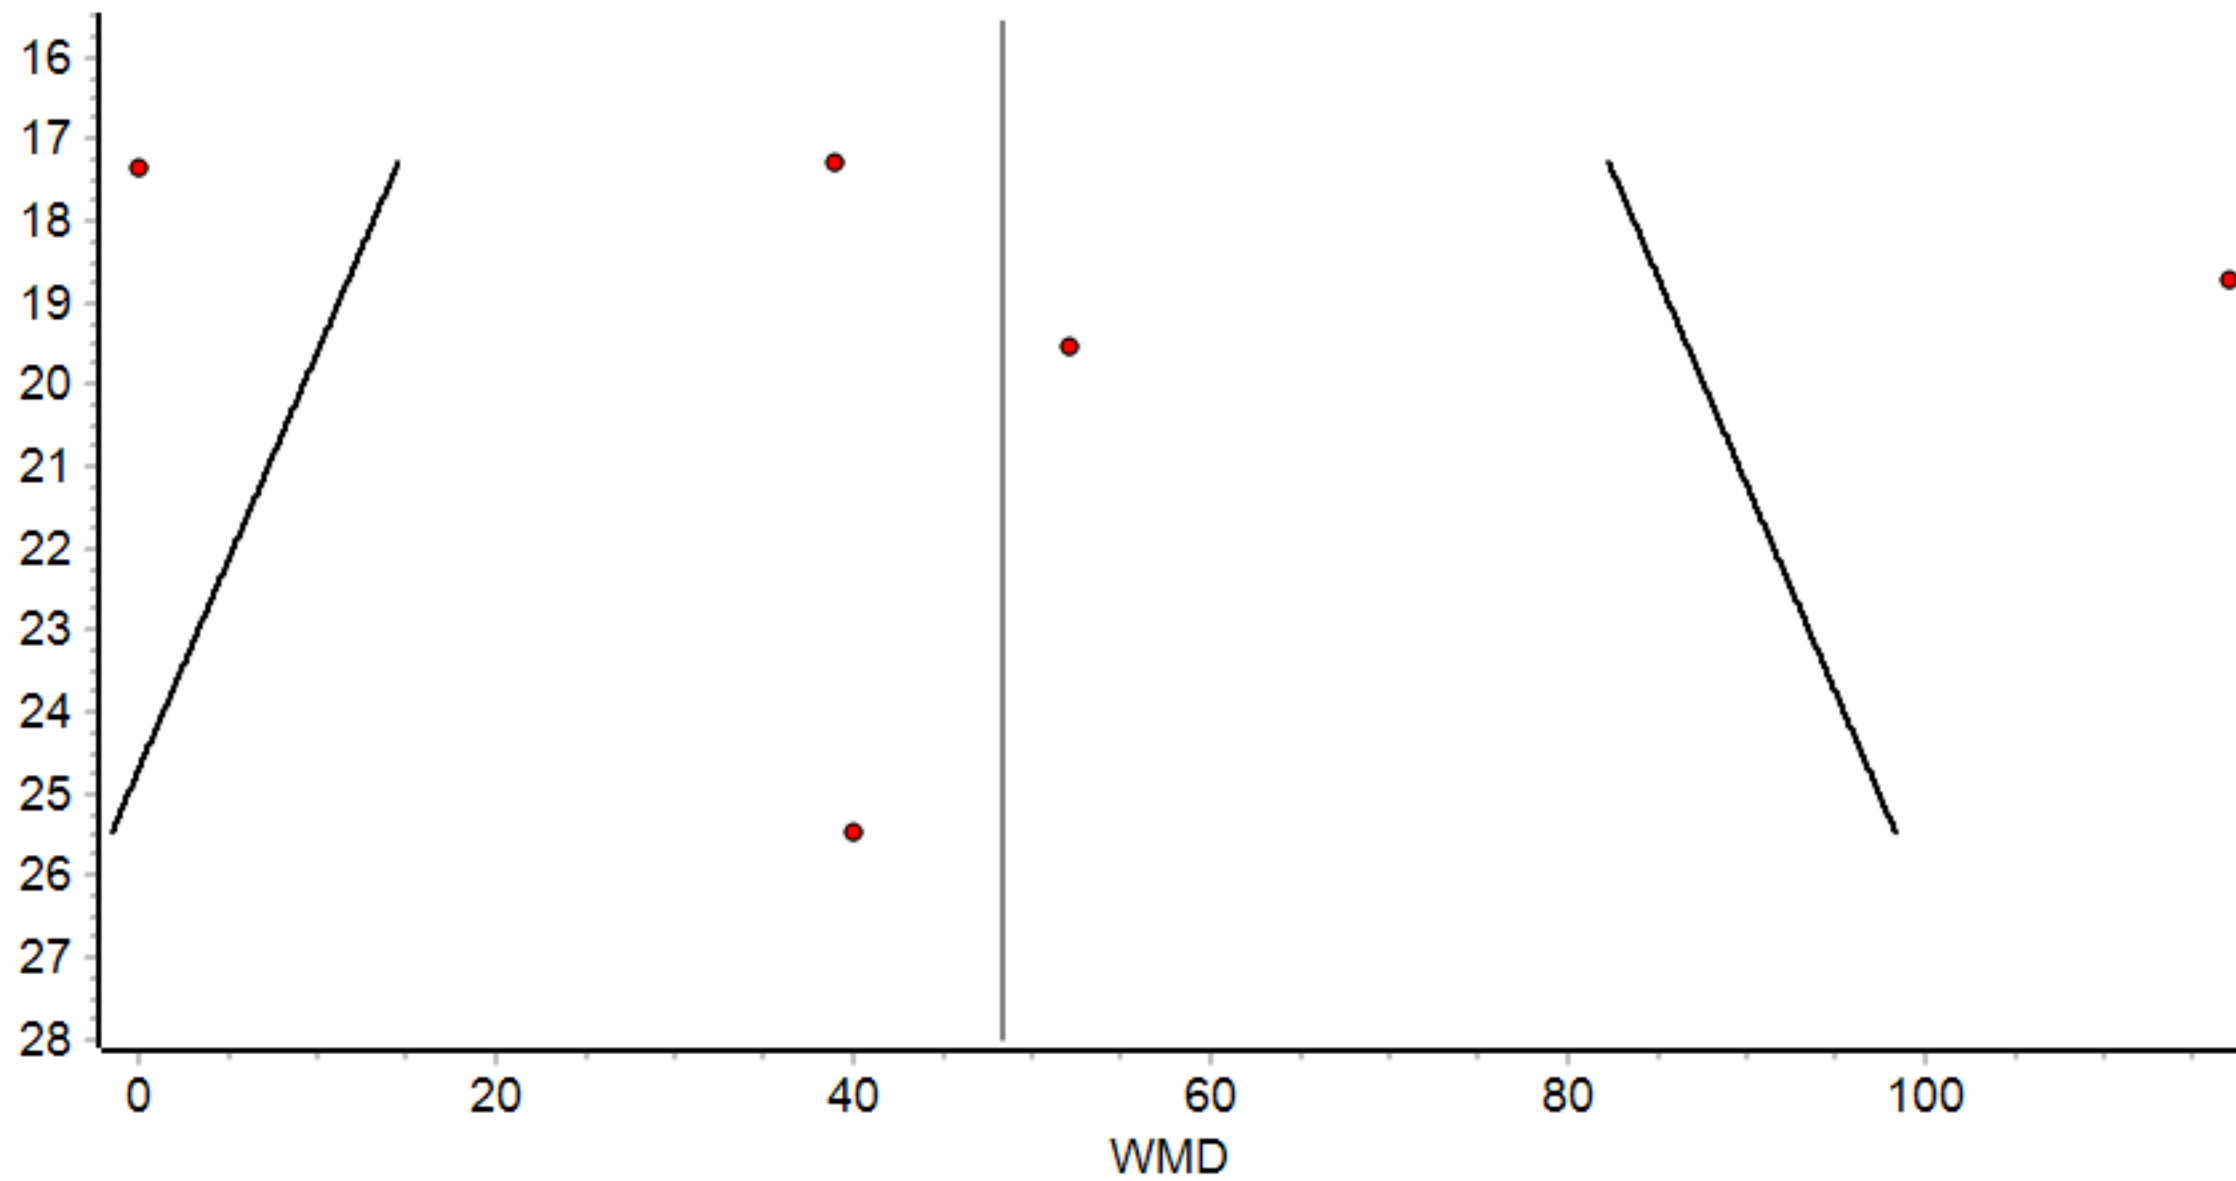

Supplement: s1 [file s1]

Standard error

0,12  
0,13  
0,14  
0,15  
0,16  
0,17  
0,18  
0,19  
0,2  
0,21  
0,22  
0,23

0,7

0,8

0,9

1

1,1

1,2

1,3

1,4

Double Arcsin Prevalence

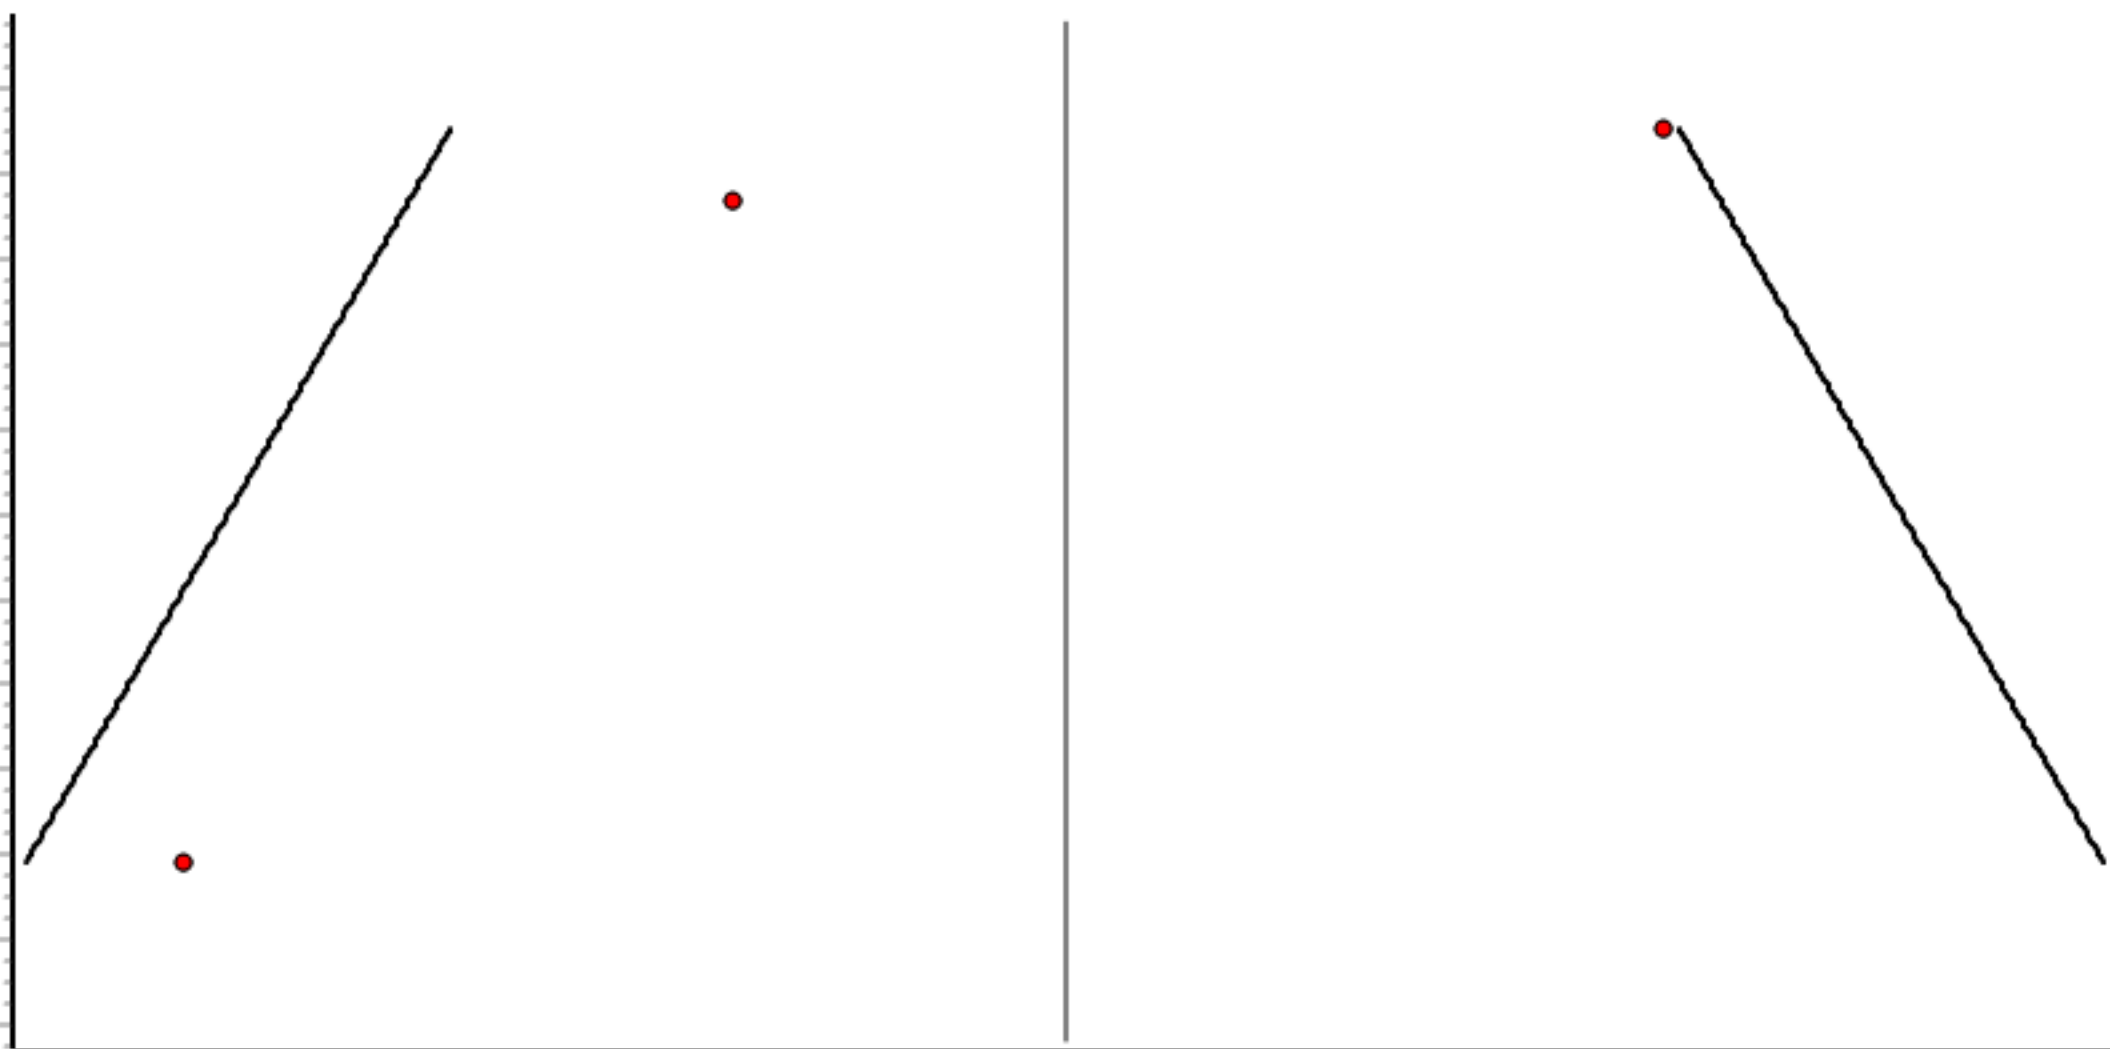

Supplement: s1 [file s1]

Standard error

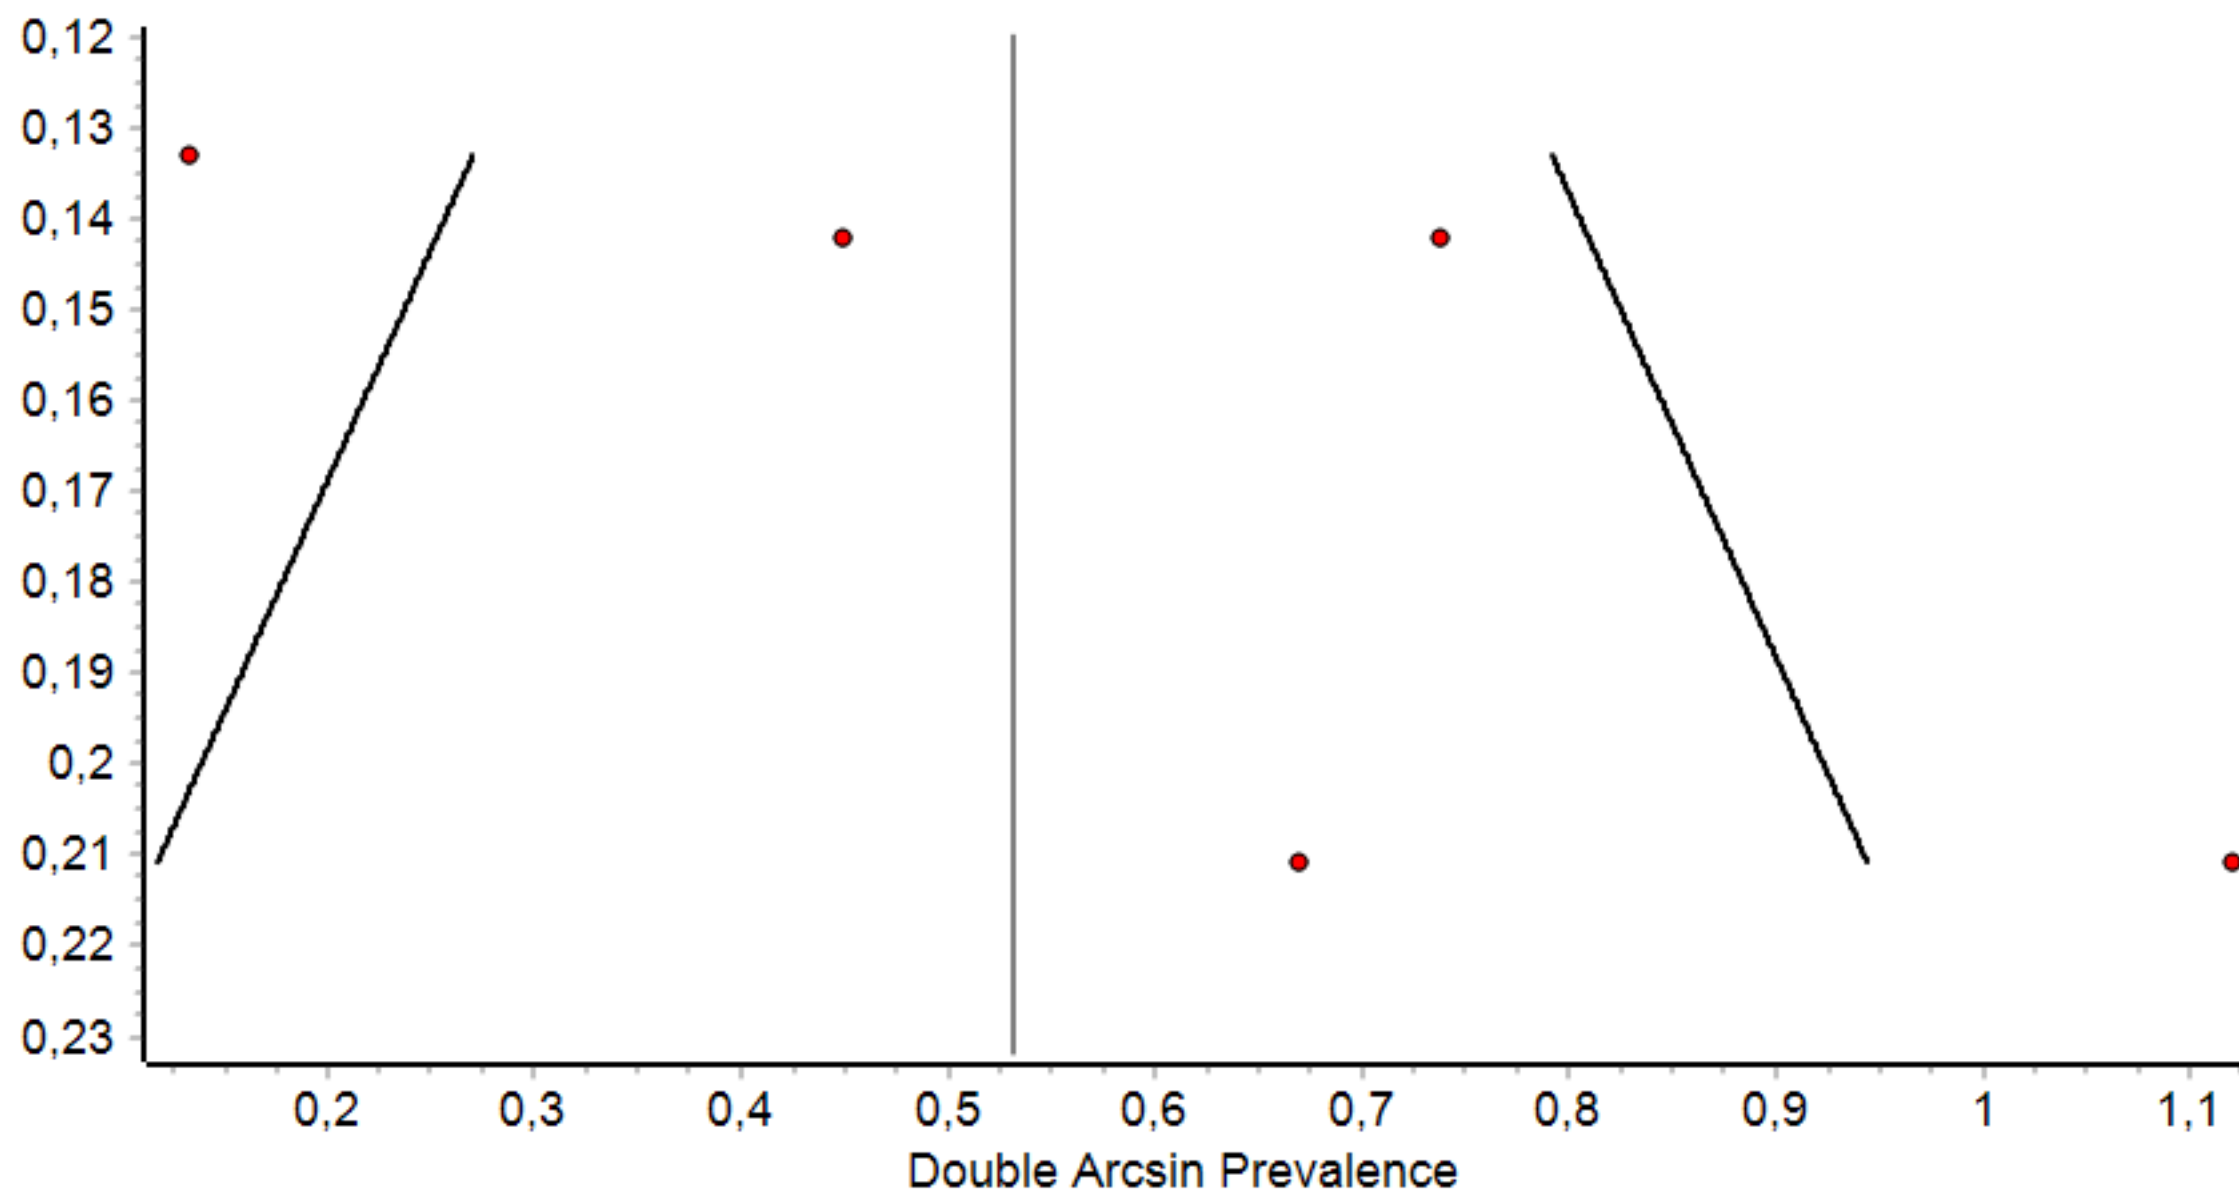

Supplement: s1 [file s1]

Standard error

0,12  
0,13  
0,14  
0,15  
0,16  
0,17  
0,18  
0,19  
0,2  
0,21  
0,22  
0,23

0

0,1

0,2

0,3

0,4

0,5

0,6

0,7

Double Arcsin Prevalence

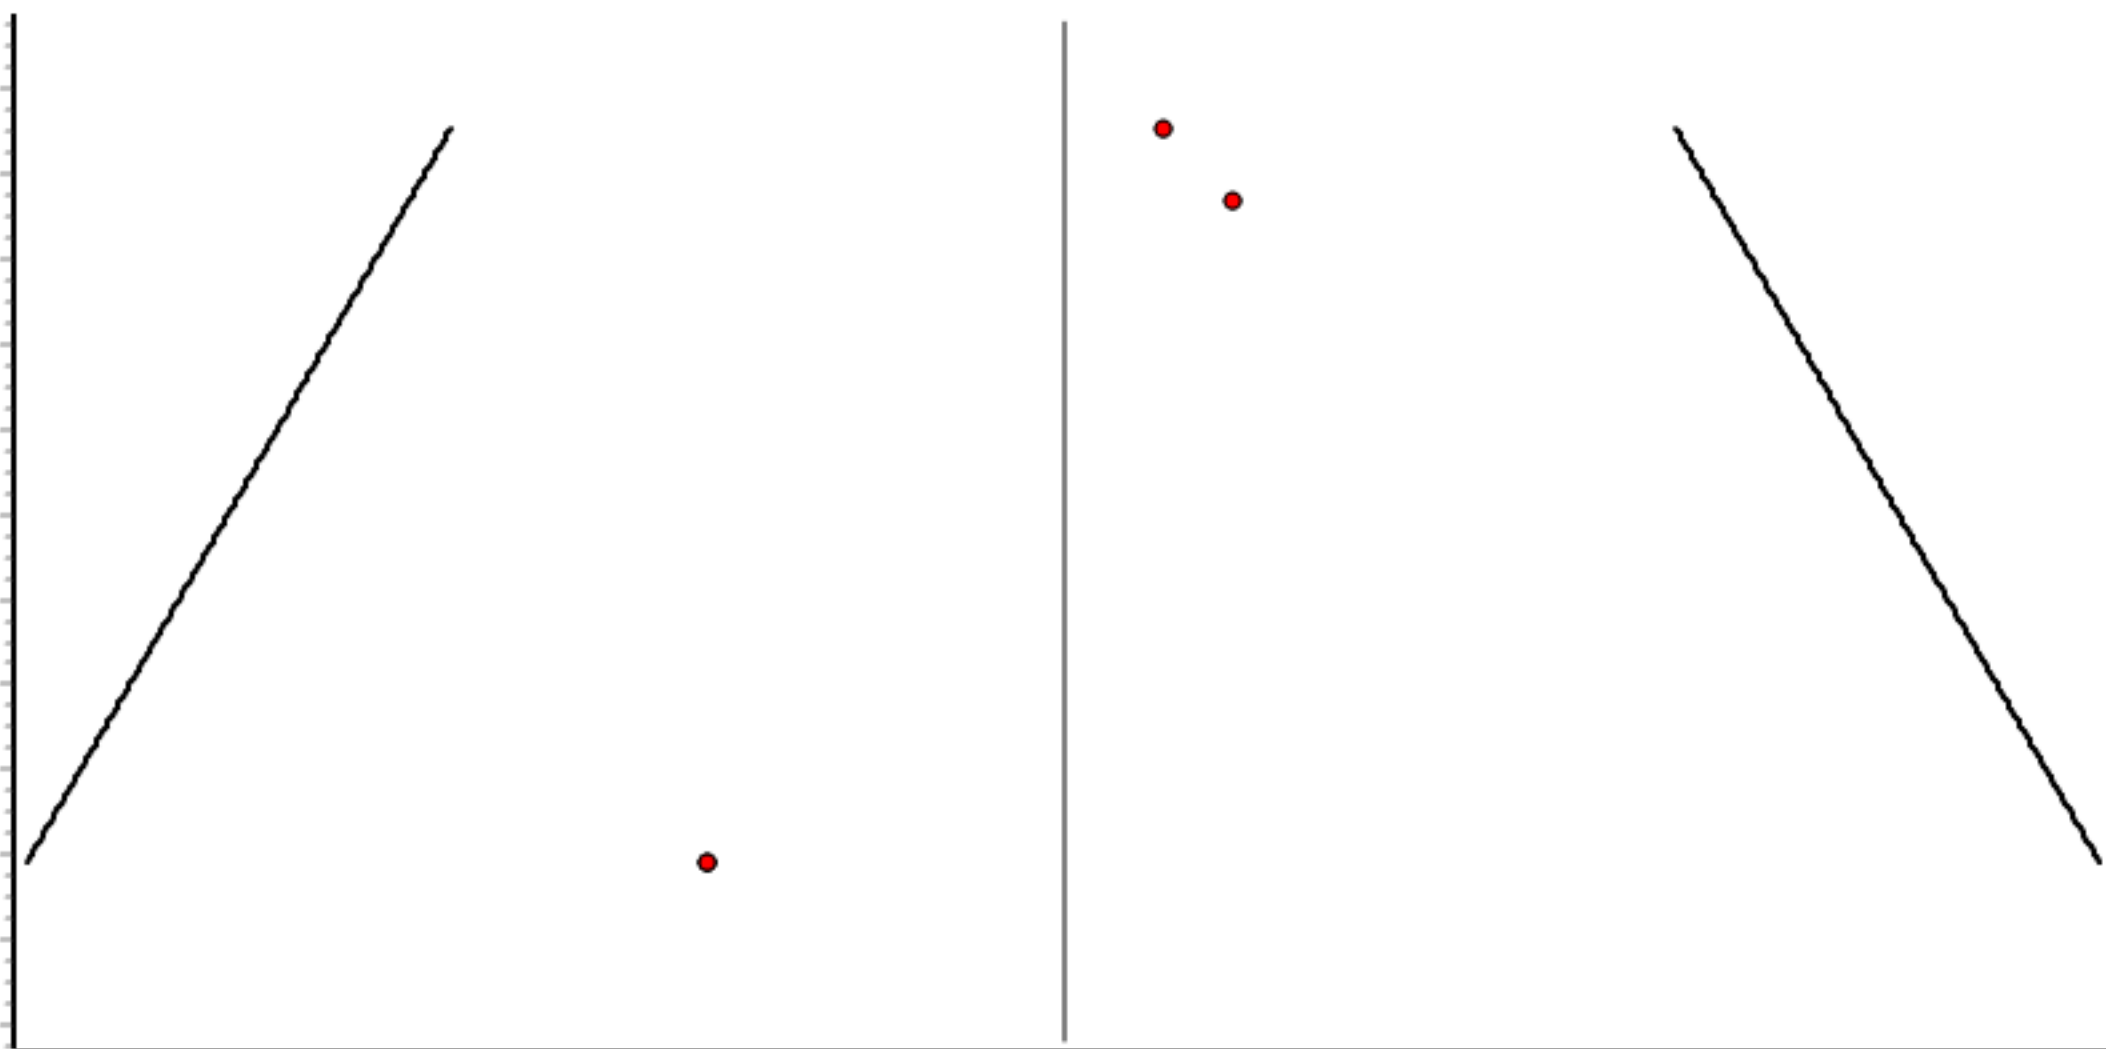

Supplement: s1 [file s1]
